# Supplementary material for: Evidence-Based Exploration as the Ground for Heritage-Led Pathways in Insular Territories: Case Study Greek Islands
Source: MDPI journal article supplement (doi:10.3390/heritage5030143), 2022-09-18
Supplement: s1 [file s1]

Archive with 3 entries (3 files):
- TableS1.pdf
- TableS2.pdf
- TableS3.pdf
