# Supplementary material for: Evidence-Based Exploration as the Ground for Heritage-Led Pathways in Insular Territories: Case Study Greek Islands
Source: MDPI journal article supplement (doi:10.3390/heritage5030143), 2022-09-18
Supplement: s1 [file s1 › TableS1.pdf]

**Table S1.** Key policy documents with regard to tourism and culture in the EU

| Data/Source                      | Document Title                                                                                                               | Content                                                                                                                                                                                                                                                                                                                                                                                                                                                                                                                                                                                                                                                                          |
|----------------------------------|------------------------------------------------------------------------------------------------------------------------------|----------------------------------------------------------------------------------------------------------------------------------------------------------------------------------------------------------------------------------------------------------------------------------------------------------------------------------------------------------------------------------------------------------------------------------------------------------------------------------------------------------------------------------------------------------------------------------------------------------------------------------------------------------------------------------|
| COM(2010) 352 final [100]        | "Europe, the world's No. 1 tourist destination – a new political framework for tourism in Europe"                            | A strategy & action plan for tourism in the EU, promoting a sustainable, responsible and of high-quality tourism model as opposed to the mass one; addressing also the reduction of mass tourism impacts on the fragile natural and cultural ecosystems of coastal and insular areas in EU.                                                                                                                                                                                                                                                                                                                                                                                      |
| COM(2014) 86 final [101]         | "A European strategy for more growth and jobs in coastal and maritime tourism"                                               | A blueprint aiming to enhance and unlock the potential of coastal and maritime tourism. It stresses the necessity for: tourism diversification; reduction of structural weaknesses (e.g. seasonality); collaboratively planned sustainable tourism initiatives, etc. It supports cultural tourism, embedding in respective tourism products coastal cultural heritage sites, underwater cultural heritage, contemporary culture, protected natural sites, etc.                                                                                                                                                                                                                   |
| COM(2018) 267 final [102]        | "A New European Agenda for Culture"                                                                                          | Tourism and culture are grasped as two tightly interwoven sectors and drivers of powerful economic activity. Dedicated strategies will support the strengthening of this dipole, promoting sustainable cultural tourism.                                                                                                                                                                                                                                                                                                                                                                                                                                                         |
| SWD(2018) 491 final [103]        | "European Framework for Action on Cultural Heritage"                                                                         | Guidelines for balancing economic benefits out of sustainable tourism practices based on accessibility to cultural and natural heritage on the one hand; and well-being of local communities on the other.                                                                                                                                                                                                                                                                                                                                                                                                                                                                       |
| SWD (2021) 164 final [104]       | "Scenarios towards co-creation of transition pathway for tourism for a more resilient, innovative and sustainable ecosystem" | Sketching of twin tourism transition scenarios - Co-creation of the transition pathway for tourism in support of a more resilient, innovative and sustainable tourism ecosystem. As pillars of this twin tourism transition are considered 'greener' and 'digitalized' destinations.                                                                                                                                                                                                                                                                                                                                                                                             |
| European Commission (2022) [105] | "Transition Pathway for Tourism"                                                                                             | The eminent role of cultural tourism in the post-pandemic era is highlighted, in response to the increasing demand for authentic experiences, grounded in local culture. Islands are marked as unique spatial entities, facing significant sustainability barriers. Their long-term resilience can be achieved by comprehensive smart and sustainable tourism strategies, based on: the unique EU strengths, well-planned market segmentation, diversification of tourism services, and wellbeing of local residents. Islands are also considered as sustainability labs; and areas for experimenting fully circular and climate-friendly approaches for residents and visitors. |

Source: Own elaboration
